# Supplementary material
Source: publisher site journal article supplement (https://cdn.jamanetwork.com/ama/content_public/journal/intemed/938894/ioi220006supp2_prod_1649946556.49132.pdf)
Supplement: Supplementary file 1 [file ioi220006supp2_prod_1649946556.49132.pdf]

## Supplemental Online Content

Lim SCL, Hor CP, Tay KH, et al; for the I-TECH Study Group. Efficacy of ivermectin treatment on disease progression among adults with mild to moderate COVID-19 and comorbidities: the I-TECH randomized clinical trial. *JAMA Intern Med*. Published online February 18, 2022. doi:10.1001/jamainternmed.2022.0189

**eTable 1.** Baseline Demographic and Clinical Characteristics of the Patients in Intention-to-Treat Population

**eTable 2.** Outcomes in Intention-to-Treat Population

**eTable 3.** Laboratory Findings at Baseline and on Day 5 of Enrollment in Primary Analysis Population

**eTable 4.** Incidence of COVID-19 related Complications in Primary Analysis Population

**eTable 5.** Proportion of Patients with Highest Oxygen Requirement in Primary Analysis Population

**eTable 6.** Post-hoc Analyses on Clinical Outcomes by Vaccination Status in Primary Analysis Population

This supplemental material has been provided by the authors to give readers additional information about their work.

## Sensitivity Analysis

**eTable 1. Baseline Demographic and Clinical Characteristics of the Patients in Intention-to-Treat Population**

| Characteristics        | No. (%)                 |                      | Difference (95% CI)                 |
|------------------------|-------------------------|----------------------|-------------------------------------|
|                        | Ivermectin<br>(n = 247) | Control<br>(n = 249) |                                     |
| <b>Demographics</b>    |                         |                      |                                     |
| Age, mean (SD), y      | 63.0 (8.9)              | 62.0 (8.4)           | 1.0 (-0.5 to 2.5) <sup>a</sup>      |
| Sex                    |                         |                      |                                     |
| Male                   | 113 (45.7)              | 112 (45.0)           | 0.77 (-7.99 to 9.53) <sup>b</sup>   |
| Female                 | 134 (54.3)              | 137 (55.0)           | -0.77 (-9.53 to 7.99) <sup>b</sup>  |
| Ethnicity              |                         |                      |                                     |
| Chinese                | 38 (15.4)               | 32 (12.9)            | 2.53 (-3.59 to 8.66) <sup>b</sup>   |
| Indian                 | 39 (15.8)               | 30 (12.0)            | 3.74 (-2.34 to 9.83) <sup>b</sup>   |
| Malay                  | 157 (63.6)              | 172 (69.1)           | -5.51 (-13.82 to 2.79) <sup>b</sup> |
| Other <sup>c</sup>     | 13 (5.3)                | 15 (6.0)             | -0.76 (-4.82 to 3.30) <sup>b</sup>  |
|                        |                         |                      |                                     |
| <b>Anthropometrics</b> |                         |                      |                                     |
| Weight, mean (SD), kg  | 68.0 (14.7)             | 68.7 (14.6)          | -0.7 (-3.2 to 1.9) <sup>a</sup>     |
| BMI, mean (SD)         | 26.8 (5.3)              | 26.9 (5.4)           | -0.1 (-1.0 to 0.9) <sup>a</sup>     |
|                        |                         |                      |                                     |

|                                                |            |            |                                     |
|------------------------------------------------|------------|------------|-------------------------------------|
| <b>COVID-19 related history</b>                |            |            |                                     |
| COVID-19 vaccination                           |            |            |                                     |
| Not vaccinated                                 | 76 (30.8)  | 84 (33.7)  | -2.97 (-11.19 to 5.26) <sup>b</sup> |
| Received one dose of vaccine                   | 43 (17.4)  | 35 (14.1)  | 3.35 (-3.05 to 9.76) <sup>b</sup>   |
| Completed two doses of vaccine                 | 128 (51.8) | 130 (52.2) | -0.39 (-9.18 to 8.41) <sup>b</sup>  |
| Disease severity on enrollment (WHO scale 2-4) |            |            |                                     |
| Mild                                           | 85 (34.4)  | 84 (33.7)  | 0.68 (-7.66 to 9.02) <sup>b</sup>   |
| Moderate                                       | 162 (65.6) | 165 (66.3) | -0.68 (-9.02 to 7.66) <sup>b</sup>  |
| Day of symptoms on enrollment, mean (SD)       | 5.1 (1.3)  | 5.1(1.3)   | 0 (-0.2 to 0.2) <sup>a</sup>        |
|                                                |            |            |                                     |
| <b>Comorbidity</b>                             |            |            |                                     |
| Hypertension                                   | 184 (74.5) | 191 (76.7) | -2.21 (-9.77 to 5.34) <sup>b</sup>  |
| Diabetes mellitus                              | 136 (55.1) | 131 (52.6) | 2.45 (-6.32 to 11.22) <sup>b</sup>  |
| Dyslipidemia                                   | 105 (42.5) | 82 (32.9)  | 9.58 (1.09 to 18.07) <sup>b</sup>   |
| Obesity                                        | 57 (23.1)  | 61 (24.5)  | -1.42 (-8.91 to 6.07) <sup>b</sup>  |
| Chronic disease                                |            |            |                                     |
| Kidney                                         | 28 (11.3)  | 43 (17.3)  | -5.93 (-12.07 to 0.20) <sup>b</sup> |
| Cardiac                                        | 38 (15.4)  | 20 (8.0)   | 7.35 (1.73 to 12.98) <sup>b</sup>   |
| Pulmonary                                      | 17 (6.9)   | 21 (8.4)   | -1.55 (-6.23 to 3.13) <sup>b</sup>  |
| Active smoker                                  | 13 (5.3)   | 7 (2.8)    | 2.45 (-1.01 to 5.92) <sup>b</sup>   |
| Cerebrovascular disease                        | 10 (4.0)   | 9 (3.6)    | 0.43 (-2.94 to 3.81) <sup>b</sup>   |

|                           |            |            |                                     |
|---------------------------|------------|------------|-------------------------------------|
| Malignant neoplasm        | 5 (2.0)    | 9 (3.6)    | -1.59 (-4.50 to 1.32) <sup>b</sup>  |
| Gout                      | 8 (3.2)    | 5 (2.0)    | 1.23 (-1.82 to 4.46) <sup>b</sup>   |
| Thyroid disease           | 5 (2.0)    | 6 (2.4)    | -0.39 (-2.98 to 2.21) <sup>b</sup>  |
| Chronic disorder          |            |            |                                     |
| Neurological              | 4 (1.6)    | 4 (1.6)    | 0.01 (-2.20 to 2.23) <sup>b</sup>   |
| Liver                     | 3 (1.2)    | 2 (0.8)    | 0.41 (-1.35 to 2.17) <sup>b</sup>   |
| Autoimmune disease        | 2 (0.8)    | 2 (0.8)    | 0.01 (-1.57 to 1.58) <sup>b</sup>   |
| Immunosuppressive therapy | 0 (0.0)    | 1 (0.4)    | -0.40 (-1.19 to 3.84) <sup>b</sup>  |
|                           |            |            |                                     |
| <b>Symptoms</b>           |            |            |                                     |
| Cough                     | 188 (76.1) | 195 (78.3) | -2.20 (-9.58 to 5.18) <sup>b</sup>  |
| Fever                     | 116 (47.0) | 125 (50.2) | -3.24 (-12.03 to 5.56) <sup>b</sup> |
| Runny nose                | 68 (27.5)  | 82 (32.9)  | -5.40 (-13.47 to 2.67) <sup>b</sup> |
| Sore throat               | 31 (12.6)  | 45 (18.1)  | -5.52 (-11.84 to 0.80) <sup>b</sup> |
| Lethargy                  | 36 (14.6)  | 31 (12.4)  | 2.13 (-3.89 to 8.14) <sup>b</sup>   |
| Anosmia                   | 31 (12.6)  | 31 (12.4)  | 0.10 (-5.72 to 5.92) <sup>b</sup>   |
| Diarrhea                  | 29 (11.7)  | 24 (9.6)   | 2.10 (-3.33 to 7.54) <sup>b</sup>   |
| Exertional dyspnea        | 25 (10.1)  | 27 (10.8)  | -0.72 (-6.11 to 4.67) <sup>b</sup>  |
| Headache                  | 22 (8.9)   | 19 (7.6)   | 1.28 (-3.57 to 6.12) <sup>b</sup>   |
| Myalgia                   | 22 (8.9)   | 14 (5.6)   | 3.28 (-1.28 to 7.85) <sup>b</sup>   |
| Ageusia                   | 22 (8.9)   | 12 (4.8)   | 4.09 (-0.35 to 8.53) <sup>b</sup>   |

|                                                           |             |             |                                    |
|-----------------------------------------------------------|-------------|-------------|------------------------------------|
| Vomiting                                                  | 9 (3.6)     | 12 (4.8)    | -1.18 (-4.72 to 2.37) <sup>b</sup> |
| Anorexia                                                  | 7 (2.8)     | 7 (2.8)     | 0.02 (-2.89 to 2.94) <sup>b</sup>  |
| Nausea                                                    | 6 (2.4)     | 4 (1.6)     | 0.82 (-1.65 to 3.30) <sup>b</sup>  |
|                                                           |             |             |                                    |
| <b>Imaging and laboratory parameters on enrollment</b>    |             |             |                                    |
| Presence of any COVID-19 lung changes (chest radiography) | 162 (65.6)  | 165 (66.3)  | -0.68 (-9.02 to 7.66) <sup>b</sup> |
| Absolute count, mean (SD), cells/ $\mu$ L                 |             |             |                                    |
| Lymphocyte                                                | 1797 (793)  | 1778 (775)  | 20 (-119 to 158) <sup>a</sup>      |
| Neutrophil                                                | 4005 (1923) | 3859 (1835) | 145 (-186 to 477) <sup>a</sup>     |
| Neutrophil to lymphocyte ratio, mean (SD)                 | 2.6 (1.7)   | 2.6 (2.0)   | 0 (-0.3 to 0.3) <sup>a</sup>       |
| Creatinine, median (IQR), mg/dL                           | 0.98 (0.49) | 1.01 (0.64) | 0.02 (-0.12 to 0.03) <sup>d</sup>  |
| Alanine transaminase, mean (SD), U/L                      | 30.3 (21.7) | 30.1 (22.0) | 0.2 (-3.7 to 4.1) <sup>a</sup>     |
| C-reactive protein, mean (SD), mg/dL                      | 2.83 (3.66) | 2.79 (3.88) | 0.04 (-0.63 to 0.70) <sup>a</sup>  |
|                                                           |             |             |                                    |
| <b>Medications given within 7 days before enrollment</b>  |             |             |                                    |
| Antibiotics                                               | 20 (8.1)    | 7 (2.8)     | 5.29 (1.31 to 9.26) <sup>b</sup>   |
| Systemic anticoagulation                                  | 20 (8.1)    | 9 (3.6)     | 4.48 (0.37 to 8.60) <sup>b</sup>   |
| Corticosteroids                                           | 2 (0.8)     | 6 (2.4)     | -1.60 (-3.81 to 0.61) <sup>b</sup> |
| Other antivirals (not for COVID-19)                       | 0 (0.0)     | 1 (0.4)     | -0.40 (-1.19 to 0.38) <sup>b</sup> |

Abbreviations: BMI, body mass index, calculated as weight in kilograms divided by height in meters squared; WHO, World Health Organization.

SI conversion factors: To convert alanine transaminase to  $\mu\text{kat/L}$ , multiply by 0.0167; C-reactive protein to  $\text{mg/L}$ , multiply by 10; creatinine to  $\mu\text{mol/L}$ , multiply by 88.4; lymphocyte and neutrophil count to  $\times 10^9/\text{L}$ , multiply by 0.001.

<sup>a</sup> Mean difference (mean of ivermectin group minus mean of the control group) with 95% CI

<sup>b</sup> Absolute difference in proportion

<sup>c</sup> Other refers to Indigenous ethnic groups in Peninsular Malaysia, Sabah and Sarawak, individuals of mixed race, and foreigners residing in Malaysia.

<sup>d</sup> The 95% CI was estimated by bootstrap sampling for median difference by using `confintr` R package.

**eTable 2. Outcomes in Intention-to-Treat Population**

| Outcomes                                            | No. (%)             |                   | Absolute difference (95%CI)         | Relative risk (95% CI) | P-value |
|-----------------------------------------------------|---------------------|-------------------|-------------------------------------|------------------------|---------|
|                                                     | Ivermectin (n= 247) | Control (n = 249) |                                     |                        |         |
| <b>Primary outcome</b>                              |                     |                   |                                     |                        |         |
| Progression to severe disease (WHO scale 5-9)       | 53 (21.5)           | 43 (17.3)         | 4.19 (-2.76 to 11.13) <sup>a</sup>  | 1.24 (0.87 to 1.78)    | .26     |
| <b>Secondary Outcomes</b>                           |                     |                   |                                     |                        |         |
| Time of progression to severe disease, mean (SD), d | 3.2 (2.4)           | 2.9 (1.8)         | 0.3 (-0.6 to 1.2) <sup>b</sup>      | NA                     | .51     |
| Patients who had mechanical ventilation             | 4 (1.6)             | 10 (4.0)          | -2.40 (-5.30 to 0.51) <sup>a</sup>  | 0.40 (0.13 to 1.27)    | .17     |
| Patients admitted to ICU                            | 6 (2.4)             | 8 (3.2)           | -0.78 (-3.70 to 2.13) <sup>a</sup>  | 0.76 (0.27 to 2.15)    | .79     |
| All-cause in-hospital mortality                     | 3 (1.2)             | 10 (4.0)          | -2.80 (-5.59 to 0.001) <sup>a</sup> | 0.30 (0.08 to 1.09)    | .09     |
| Length of stay, mean (SD), d                        | 7.7 (4.4)           | 7.3 (4.3)         | 0.4 (-0.4 to 1.1) <sup>b</sup>      | NA                     | .34     |

All outcomes were captured from randomization until discharge from study sites or day 28 of enrollment, whichever earlier.

Abbreviations: ICU, intensive care unit; NA, not applicable; WHO, World Health Organization.

<sup>a</sup> Absolute difference in proportion.

<sup>b</sup> Mean difference (mean of ivermectin group minus mean of control group) with 95% CI.

## Additional Primary Analysis

**eTable 3. Laboratory Findings at Baseline and on Day 5 of Enrollment in Primary Analysis Population**

| Laboratory values, mean (SD)               | Ivermectin (n = 238 <sup>a</sup> ) |             |                          | Control (n = 247 <sup>b</sup> ) |             |                          | P-value <sup>c</sup> |
|--------------------------------------------|------------------------------------|-------------|--------------------------|---------------------------------|-------------|--------------------------|----------------------|
|                                            | Baseline                           | Day 5       | Mean Difference (95% CI) | Baseline                        | Day 5       | Mean Difference (95% CI) |                      |
| Absolute lymphocyte count (cells/ $\mu$ L) | 1801 (793)                         | 1978 (923)  | 176 (85 to 267)          | 1780 (776)                      | 1970 (918)  | 190 (109 to 271)         | .82                  |
| Absolute neutrophil count (cells/ $\mu$ L) | 3963 (1890)                        | 4550 (2568) | 588 (320 to 856)         | 3852 (1826)                     | 4582 (2502) | 731 (443 to 1019)        | .47                  |
| Neutrophil-lymphocyte ratio                | 2.6 (1.7)                          | 3.2 (3.5)   | 0.6 (0.1 to 1.0)         | 2.6 (2.1)                       | 3.1 (3.3)   | 0.5 (0.1 to 0.9)         | .82                  |
| Creatinine (mg/dL)                         | 1.75 (2.74)                        | 1.72 (2.73) | -0.03 (-0.17 to 0.12)    | 2.26 (3.52)                     | 2.23 (3.60) | -0.03 (-0.21 to 0.15)    | .97                  |
| Alanine transaminase (U/L)                 | 30.2 (21.8)                        | 31.3 (21.8) | 1.1 (-1.1 to 3.4)        | 30.1 (22.0)                     | 32.8 (26.0) | 2.7 (0.2 to 5.3)         | .36                  |
| C-reactive protein (mg/dL)                 | 2.82 (3.68)                        | 3.16 (3.98) | 0.34 (-0.19 to 0.86)     | 2.76 (3.87)                     | 3.65 (5.19) | 0.89 (0.22 to 1.56)      | .20                  |

SI conversion factors: To convert alanine transaminase to  $\mu$ kat/L, multiply by 0.0167; C-reactive protein to mg/L, multiply by 10; creatinine to  $\mu$ mol/L, multiply by 88.4; lymphocyte and neutrophil count to  $\times 10^9/L$ , multiply by 0.001.

<sup>a</sup> Three patients withdrew from study before day 5 after taking at least one dose of ivermectin.

<sup>b</sup> Two patients died before follow-up on day 5.

<sup>c</sup> P-value showed statistical significance of interaction between time (baseline, day 5) and study groups (ivermectin, control).



**eTable 4. Incidence of COVID-19 related Complications in Primary Analysis Population**

| Complications             | No. (%)                               |                      | <i>P</i> -value |
|---------------------------|---------------------------------------|----------------------|-----------------|
|                           | Ivermectin<br>(n = 238 <sup>a</sup> ) | Control<br>(n = 249) |                 |
| Any complications         | 73 (30.7)                             | 70 (28.1)            | .55             |
| Cytokine release syndrome | 28 (11.8)                             | 26 (10.4)            | .56             |
| Pulmonary embolism        | 5 (2.1)                               | 7 (2.8)              | .77             |
| Organizing pneumonia      | 13 (5.5)                              | 8 (3.2)              | .27             |
| Bacterial infection       | 26 (10.9)                             | 25 (10.0)            | .77             |
| Fungal infection          | 1 (0.4)                               | 2 (0.8)              | >.99            |
| Other complications       | 19 (8.0)                              | 12 (4.8)             | .19             |

<sup>a</sup> Three patients withdrew from study before day 5 after taking at least one dose of ivermectin.

**eTable 5. Proportion of Patients with Highest Oxygen Requirement in Primary Analysis Population**

| Highest needs for oxygen therapy during study | No. (%)              |                   | <i>P</i> -value |
|-----------------------------------------------|----------------------|-------------------|-----------------|
|                                               | Ivermectin (n = 241) | Control (n = 249) |                 |
| Room air                                      | 189 (78.4)           | 206 (82.7)        | .07             |
| Nasal prong                                   | 23 (9.5)             | 18 (7.2)          |                 |
| Simple face mask                              | 15 (6.2)             | 4 (1.6)           |                 |
| High-flow mask                                | 4 (1.7)              | 6 (2.4)           |                 |
| High-flow nasal cannula                       | 5 (2.1)              | 4 (1.6)           |                 |
| Non-invasive ventilation                      | 1 (0.4)              | 1 (0.4)           |                 |
| Mechanical ventilation                        | 4 (1.7)              | 10 (4.0)          |                 |

**eTable 6. Post-hoc Analyses on Clinical Outcomes by Vaccination Status in Primary Analysis Population**

| Outcomes                                      | No. (%)                         |                                  |                                    |                 |                                 |                                  |                                    |                 |
|-----------------------------------------------|---------------------------------|----------------------------------|------------------------------------|-----------------|---------------------------------|----------------------------------|------------------------------------|-----------------|
|                                               | Ivermectin<br>(n = 241)         |                                  |                                    |                 | Control<br>(n = 249)            |                                  |                                    |                 |
|                                               | Never<br>Vaccinated<br>(n = 75) | Vaccinated<br>1 Dose<br>(n = 42) | Vaccinated<br>2 Doses<br>(n = 124) | <i>P</i> -value | Never<br>Vaccinated<br>(n = 84) | Vaccinated<br>1 Dose<br>(n = 35) | Vaccinated<br>2 Doses<br>(n = 130) | <i>P</i> -value |
| Progression to Severe Disease (WHO scale 5-9) | 21 (28.0)                       | 9 (21.4)                         | 22 (17.7)                          | .23             | 22 (26.2)                       | 9 (25.7)                         | 12 (9.2)                           | <.01            |
| Death                                         | 1 (1.3)                         | 0 (0)                            | 2 (1.6)                            | >.99            | 4 (4.8)                         | 1 (2.9)                          | 5 (3.8)                            | .91             |
